# Supplementary material for: Selective NLRP3 (Pyrin Domain–Containing Protein 3) Inflammasome Inhibitor Reduces Brain Injury After Intracerebral Hemorrhage
Source: PubMed Central journal article supplement — Stroke. 2018 Jan 1;49(1):184–92. doi: 10.1161/STROKEAHA.117.018904 (PMC5753818; doi:10.1161/strokeaha.117.018904), 2018-01-01
Supplement: str-49-184-s002.pdf [file str-49-184-s002.pdf]

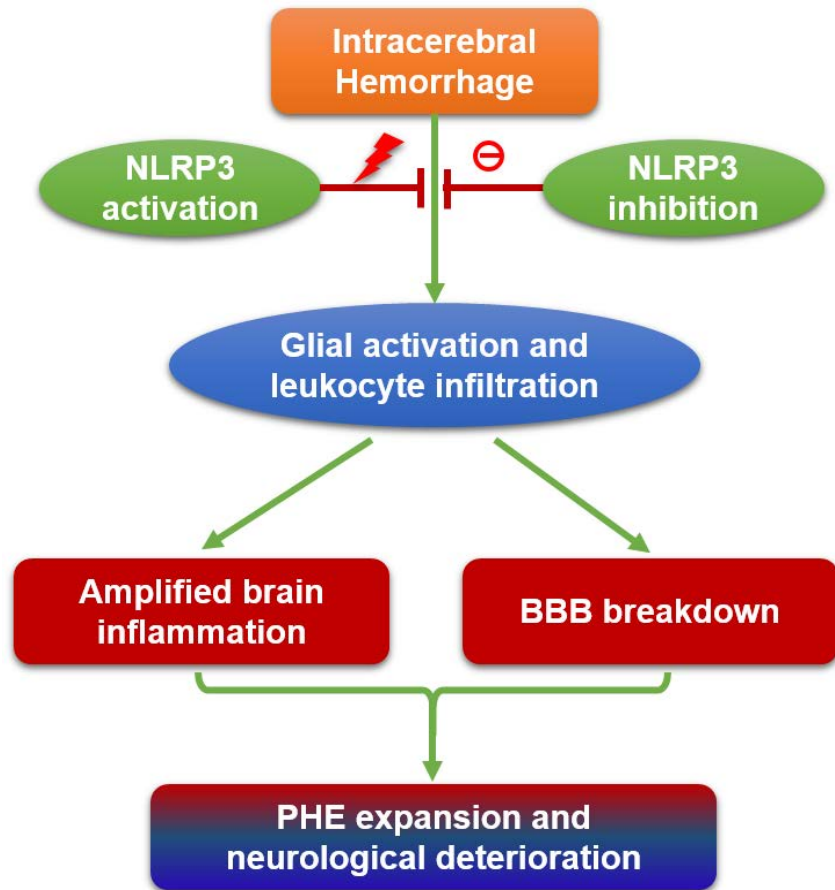

### Schematic diagram of NLRP3 inhibition in ICH.

As a key component of the innate immune system, the NLRP3 inflammasome, when activated after ICH, boosts neuroinflammation and participates in ICH injury. MCC950 is a potent, selective, small-molecule NLRP3 inhibitor that blocks NLRP3 activation. NLRP3 inhibition can attenuate neuroinflammation, BBB breakdown, PHE expansion and neurological deterioration. Abbreviation: NLRP3, NOD-like receptor family, pyrin domain-containing protein 3; ICH, intracerebral hemorrhage; PHE, perihematomal edema; BBB, blood-brain barrier.
